# Supplementary material for: Revisited heat budget and probability distributions of turbulent heat fluxes in the Mediterranean Sea
Source: Copernicus journal article supplement (doi:10.5194/egusphere-2025-2867), 2025-07-01
Supplement: Supplementary file 1 [file egusphere-2025-2867-supplement.pdf]

# Supplementary Material

## For

### Revisited heat budget and probability distributions of turbulent heat fluxes in the Mediterranean Sea

Mahmud Hasan Ghani<sup>1</sup>, Nadia Pinardi<sup>1,2</sup>, Antonio Navarra<sup>1,3</sup>, Lorenzo Mentaschi<sup>1,2</sup>, Silvia Bianconcini<sup>4</sup>, Francesco Maicu<sup>2</sup>, and Francesco Trotta<sup>2</sup>

<sup>1</sup> Dept. of Physics and Astronomy, University of Bologna, Bologna, Italy

<sup>2</sup> CMCC Foundation - Euro-Mediterranean Center on Climate Change, Italy

<sup>3</sup> Dept. of Biological, Geological and Environmental Sciences, University of Bologna, Bologna, Italy

<sup>4</sup> Dept. of Statistics, University of Bologna, Bologna, Italy

#### TABLE OF CONTENTS

Figure. S1. Monthly time series of surface averaged heat fluxes for the observed period 2006-2020. The mean value with the solid dashed line is also indicated for each flux component

Figure S2: Monthly time series of surface averaged net heat fluxes  $Q_{\text{net}}$  for the observed period 2006-2020. The mean value is indicated with the black dashed line.

Figure S3: Monthly time series of surface averaged net heat fluxes  $Q_{\text{net}}$  and time series after removal of winter extremes using lower IQR bound for the observed period 2006-2020.

Figure S3: Comparison of the statistical moments (variance, skewness, kurtosis) computed from the SH flux anomaly series and estimated statistical moments computed using the ALD PDF parameter values

Figure S4: Comparison of the statistical moments (variance, skewness, kurtosis) for observed LH flux anomaly series and estimated statistical moments computed using skew-normal PDF parameter values

Figure S5: Chi-square test statistics computed for the applied PDFs and observed anomalies; ALD PDF for SH flux (left) and Skew-normal PDF for LH flux (right)

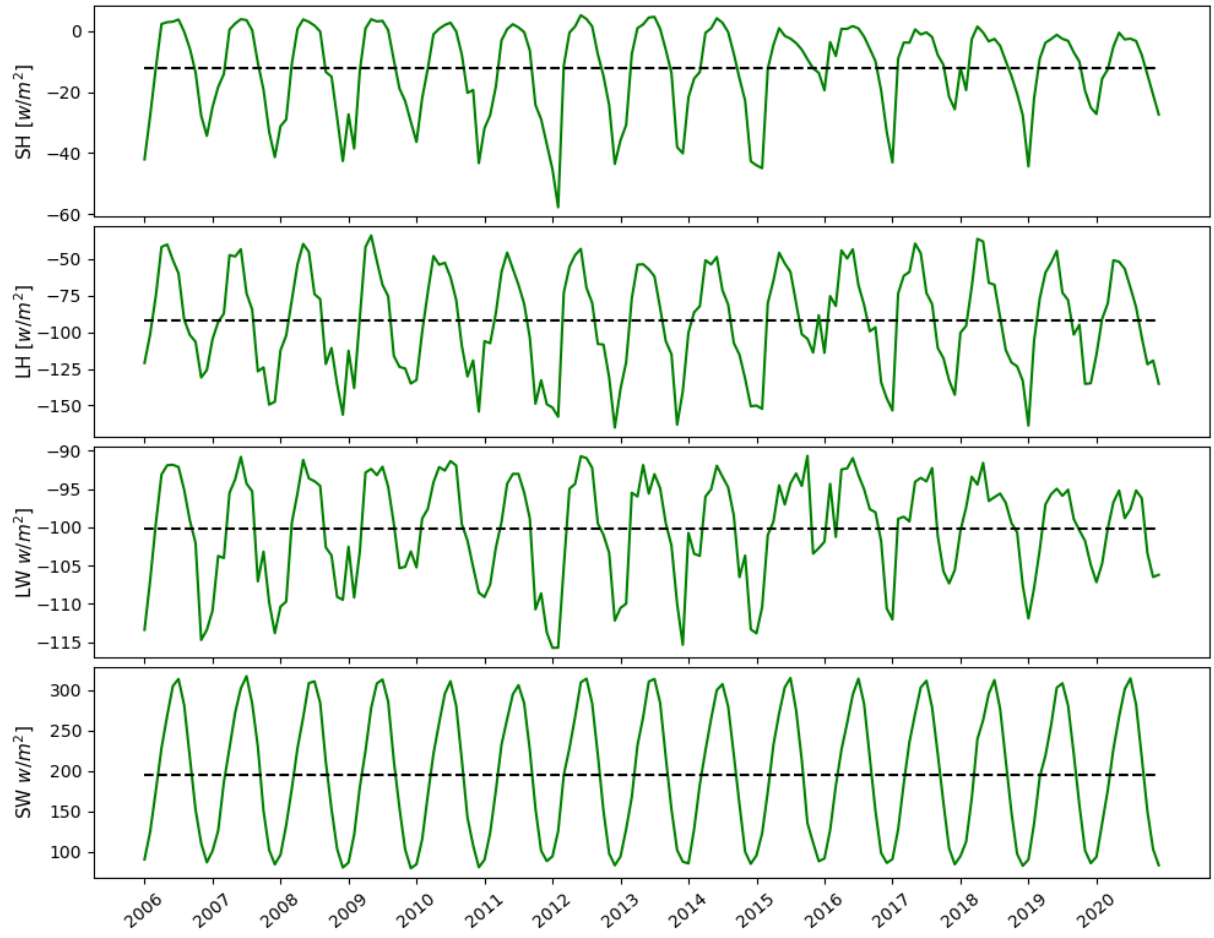

**Figure S1: Monthly time series of surface averaged heat fluxes for ECMWF and the observed period 2006-2020. The mean value with the solid dashed line is also indicated for each flux component.**

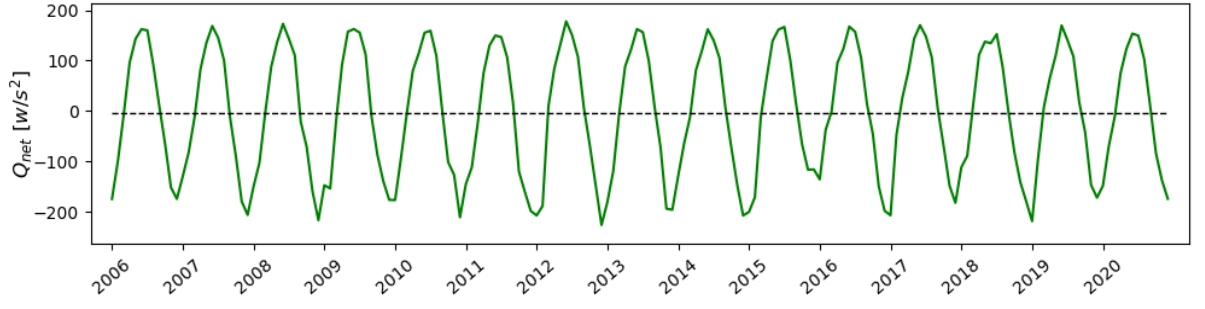

**Figure S2: Monthly time series of surface averaged net heat fluxes  $Q_{net}$  for the observed period 2006-2020. The mean value is marked with dashed line**

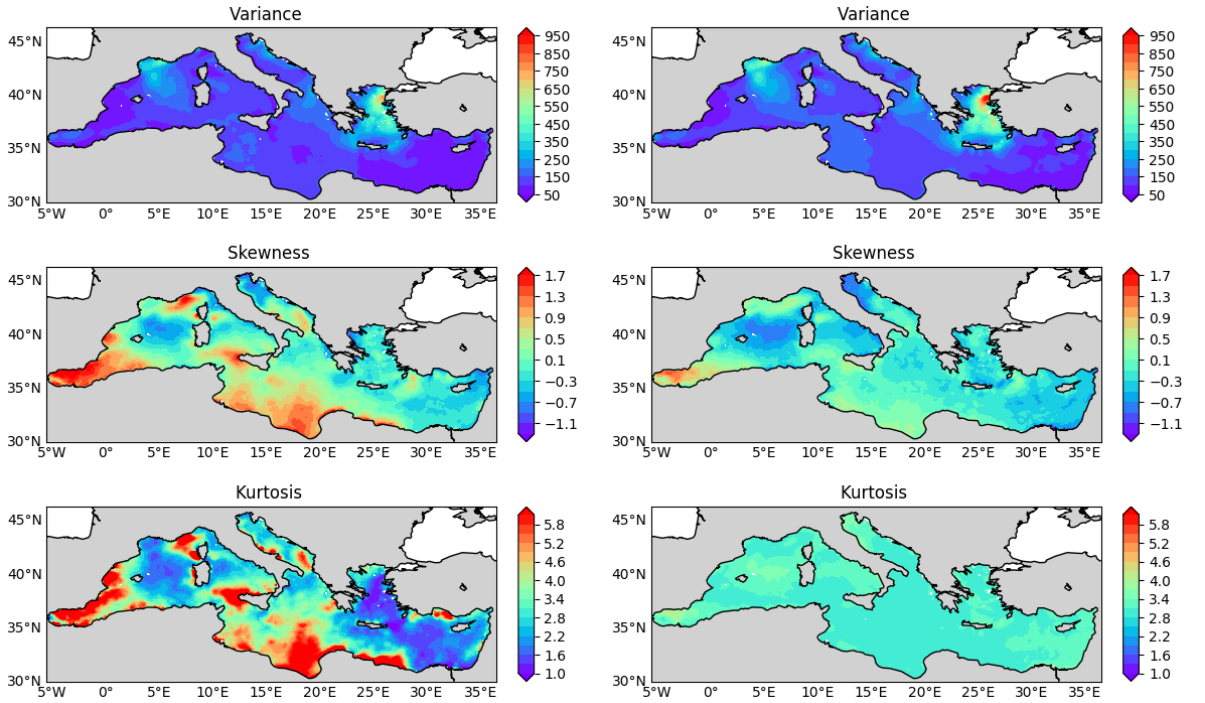

**Figure S3: Comparison of the statistical moments (variance, skewness, kurtosis) computed from the SH flux anomaly series and estimated statistical moments computed using the ALD PDF parameter values**

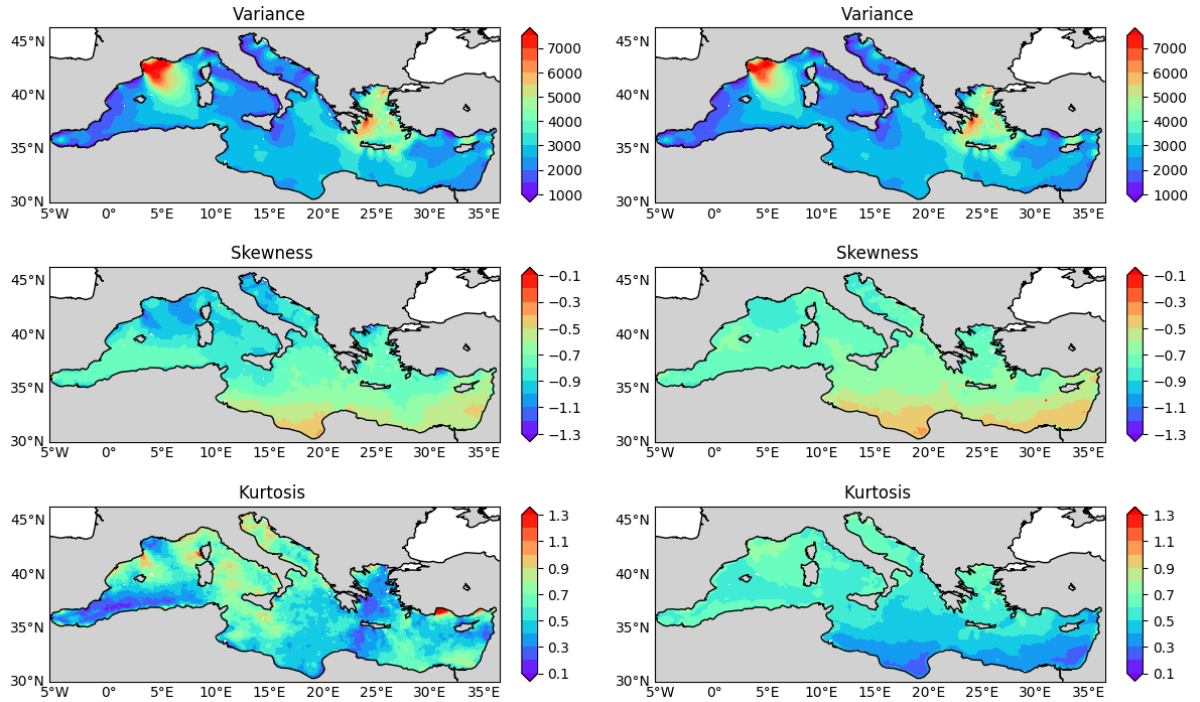

**Figure S4: Comparison of the statistical moments (variance, skewness, kurtosis) for observed LH flux anomaly series and estimated statistical moments computed using Skew-normal PDF parameter values**

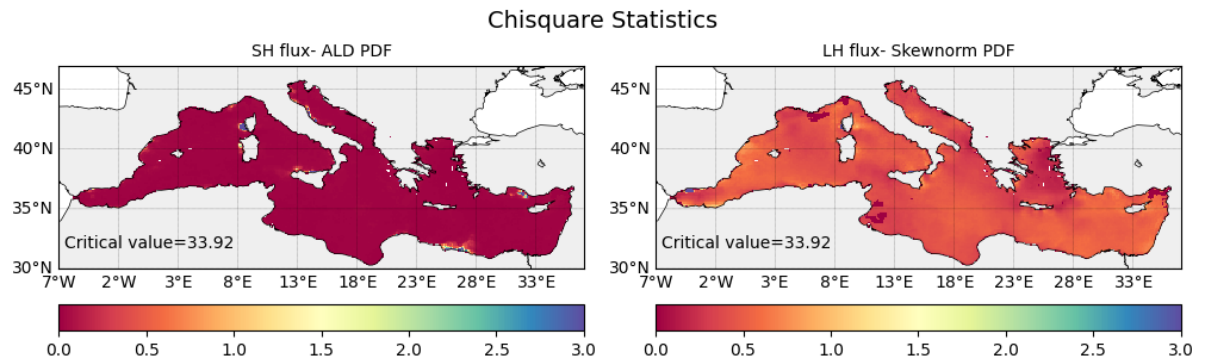

**Figure S5: Chi-square test statistics computed for the applied PDFs and observed anomalies; ALD PDF for SH flux (left) and Skew-normal PDF for LH flux (right). All sea grid points values below the critical value (33.92) are theoretically accepted and aligned with applied PDFs.**
